# Supplementary material for: The prognostic significance of tumor-associated neutrophils and circulating neutrophils in glioblastoma (WHO CNS5 classification)
Source: PubMed Central journal article supplement (PMC9817270; doi:10.1186/s12885-022-10492-9), 2023-01-06

**A**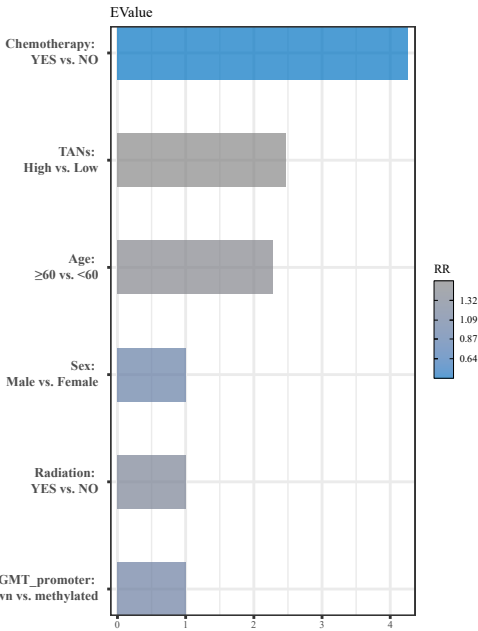**B**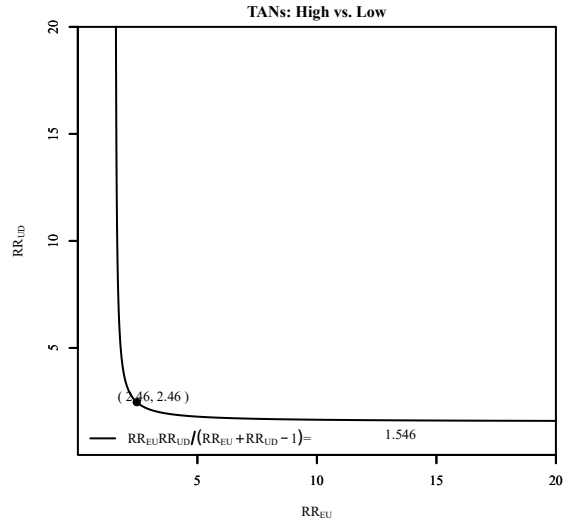**C**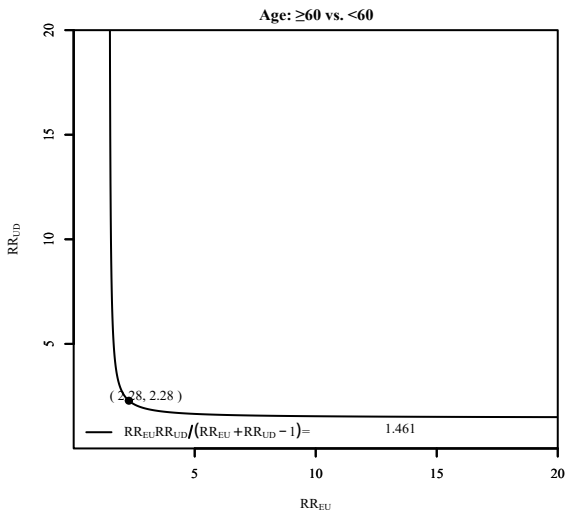**D**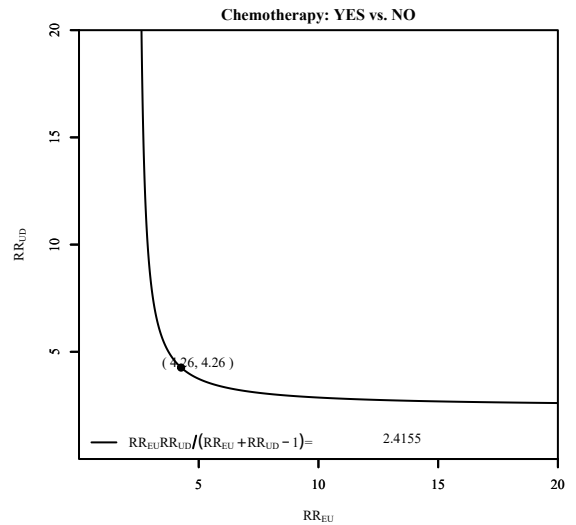

Supplement: 12885_2022_10492_MOESM2_ESM.pdf [file 12885_2022_10492_MOESM2_ESM.pdf]
